# Supplementary material for: In Vitro Activity of Ceftaroline and Comparators against Bacterial Isolates Collected Globally from Patients with Skin and Soft Tissue Infections: ATLAS Program 2019–2020
Source: MDPI journal article supplement (doi:10.3390/antibiotics12081237), 2023-07-26
Supplement: s1 [file s1]

**Table S1.** List of countries contributing isolates collected from SSTIs (2019–2020).

| Contributing sites and number of isolates by year |                        |                                 |                    |                                 |                    |                                 |                    |
|---------------------------------------------------|------------------------|---------------------------------|--------------------|---------------------------------|--------------------|---------------------------------|--------------------|
| Region                                            | Contributing countries | 2019                            |                    | 2020                            |                    | 2019–2020                       |                    |
|                                                   |                        | Contributing Sites <sup>a</sup> | Number of isolates | Contributing Sites <sup>a</sup> | Number of isolates | Contributing Sites <sup>a</sup> | Number of isolates |
| Africa/Middle East                                |                        | 85                              | 691                | 90                              | 816                | 110                             | 1507               |
|                                                   | Cameroon               | 0                               | 0                  | 3                               | 10                 | 3                               | 10                 |
|                                                   | Israel                 | 20                              | 144                | 17                              | 179                | 24                              | 323                |
|                                                   | Ivory Coast            | 0                               | 0                  | 3                               | 17                 | 3                               | 17                 |
|                                                   | Jordan                 | 2                               | 5                  | 1                               | 1                  | 2                               | 6                  |
|                                                   | Kuwait                 | 10                              | 137                | 17                              | 161                | 17                              | 298                |
|                                                   | Morocco                | 16                              | 98                 | 14                              | 102                | 19                              | 197                |
|                                                   | Nigeria                | 10                              | 93                 | 9                               | 120                | 10                              | 213                |
|                                                   | Qatar                  | 3                               | 16                 | 5                               | 31                 | 5                               | 47                 |
|                                                   | Saudi Arabia           | 5                               | 51                 | 4                               | 44                 | 5                               | 95                 |
|                                                   | South Africa           | 19                              | 147                | 17                              | 151                | 22                              | 294                |
| Asia-Pacific                                      |                        | 194                             | 1248               | 161                             | 1340               | 236                             | 2588               |
|                                                   | China                  | 42                              | 253                | 14                              | 92                 | 50                              | 345                |
|                                                   | Hong Kong              | 5                               | 46                 | 7                               | 70                 | 9                               | 116                |
|                                                   | India                  | 38                              | 285                | 29                              | 338                | 39                              | 623                |
|                                                   | Japan                  | 8                               | 31                 | 12                              | 59                 | 14                              | 90                 |
|                                                   | Korea, South           | 7                               | 46                 | 9                               | 78                 | 12                              | 124                |
|                                                   | Malaysia               | 12                              | 54                 | 9                               | 75                 | 12                              | 129                |
|                                                   | Philippines            | 17                              | 102                | 14                              | 122                | 19                              | 224                |
|                                                   | Taiwan                 | 18                              | 138                | 14                              | 75                 | 20                              | 213                |

|        |                |            |             |            |             |            |             |
|--------|----------------|------------|-------------|------------|-------------|------------|-------------|
| Europe | Thailand       | 19         | 79          | 17         | 120         | 22         | 199         |
|        | Australia      | 25         | 179         | 26         | 235         | 28         | 414         |
|        | New Zealand    | 3          | 35          | 10         | 76          | 11         | 111         |
|        |                | <b>487</b> | <b>3201</b> | <b>441</b> | <b>2761</b> | <b>598</b> | <b>5962</b> |
|        | Belgium        | 30         | 158         | 32         | 154         | 44         | 312         |
|        | Croatia        | 13         | 65          | 15         | 82          | 18         | 147         |
|        | Czech Republic | 21         | 156         | 21         | 144         | 24         | 300         |
|        | Denmark        | 7          | 40          | 1          | 6           | 7          | 46          |
|        | Finland        | 6          | 48          | 7          | 73          | 7          | 121         |
|        | France         | 36         | 174         | 41         | 171         | 49         | 345         |
|        | Germany        | 61         | 404         | 51         | 366         | 71         | 770         |
|        | Greece         | 14         | 106         | 22         | 146         | 24         | 252         |
|        | Hungary        | 22         | 132         | 27         | 175         | 27         | 307         |
|        | Ireland        | 13         | 101         | 9          | 74          | 14         | 175         |
|        | Italy          | 37         | 220         | 30         | 208         | 41         | 428         |
|        | Latvia         | 4          | 17          | 5          | 16          | 5          | 33          |
|        | Lithuania      | 13         | 44          | 11         | 56          | 14         | 100         |
|        | Netherlands    | 9          | 55          | 9          | 47          | 10         | 102         |
|        | Poland         | 23         | 119         | 20         | 108         | 24         | 227         |
|        | Portugal       | 20         | 125         | 12         | 111         | 20         | 236         |
|        | Romania        | 11         | 71          | 12         | 100         | 16         | 171         |
|        | Russia         | 35         | 396         | 1          | 4           | 35         | 396         |
|        | Slovenia       | 0          | 0           | 11         | 40          | 7          | 36          |
|        | Spain          | 62         | 434         | 56         | 344         | 71         | 784         |
|        | Sweden         | 4          | 46          | 4          | 16          | 5          | 57          |
|        | Switzerland    | 8          | 56          | 4          | 32          | 10         | 95          |
|        | Turkey         | 14         | 54          | 14         | 62          | 17         | 116         |
|        | Ukraine        | 4          | 43          | 14         | 129         | 14         | 172         |

|               |                    |            |            |            |            |            |             |
|---------------|--------------------|------------|------------|------------|------------|------------|-------------|
| Latin America | United Kingdom     | 20         | 137        | 12         | 97         | 24         | 234         |
|               |                    | <b>119</b> | <b>810</b> | <b>128</b> | <b>792</b> | <b>156</b> | <b>1725</b> |
|               | Argentina          | 12         | 82         | 15         | 129        | 17         | 222         |
|               | Brazil             | 12         | 60         | 25         | 88         | 26         | 174         |
|               | Chile              | 15         | 72         | 13         | 56         | 16         | 131         |
|               | Colombia           | 22         | 129        | 14         | 86         | 26         | 221         |
|               | Costa Rica         | 5          | 33         | 5          | 25         | 6          | 63          |
|               | Dominican Republic | 4          | 39         | 5          | 43         | 5          | 88          |
|               | Guatemala          | 12         | 76         | 12         | 89         | 14         | 196         |
|               | Mexico             | 23         | 179        | 24         | 145        | 28         | 347         |
|               | Panama             | 5          | 32         | 8          | 54         | 9          | 92          |
|               | Venezuela          | 9          | 108        | 7          | 77         | 9          | 191         |

<sup>a</sup>Indicates number of unique sites that collected isolates.
